# Supplementary material for: Combination of solid phase extraction and surface-enhanced Raman spectroscopy for rapid analysis
Source: Royal Society of Chemistry journal article supplement (doi:10.1039/c3an36700b), 2013-01-01

Electronic Supplementary Information for

# Combination of Solid Phase Extraction and Surface-enhanced Raman Spectroscopy for Rapid Analysis

Yongchao Lai,<sup>a</sup> Jingcheng Cui,<sup>a</sup> Xiaohong Jiang,<sup>a</sup> Sha Zhu<sup>a</sup> and Jinhua Zhan\*<sup>a</sup>

*Key Laboratory for Colloid & Interface Chemistry of Education Ministry, Department of Chemistry,  
Shandong University, Jinan 250100 China*

[jhzhan@sdu.edu.cn](mailto:jhzhan@sdu.edu.cn)

## 1. The experimental set-up

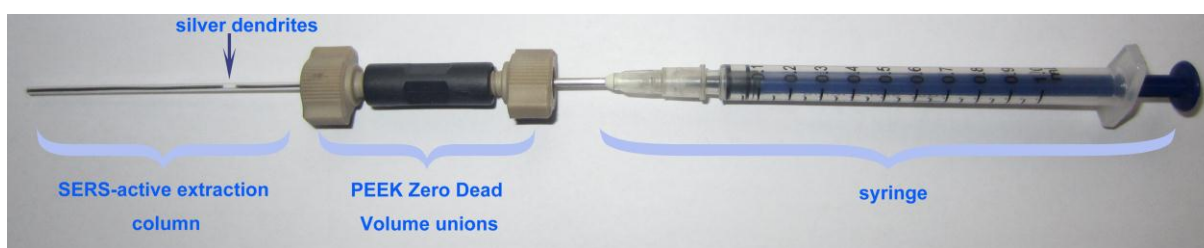

## 2. The list of abbreviation

SERS: Surface-enhanced Raman spectroscopy

SPE: Solid phase extraction

SMA: SubMiniature version A

FFT: Full frame transfer

CCD: Charge-coupled device

SEM: Scanning electron microscope

PEEK: Polyether ether ketone

### 3. SERS spectra of a single cycle and the corresponding background-corrected spectrum.

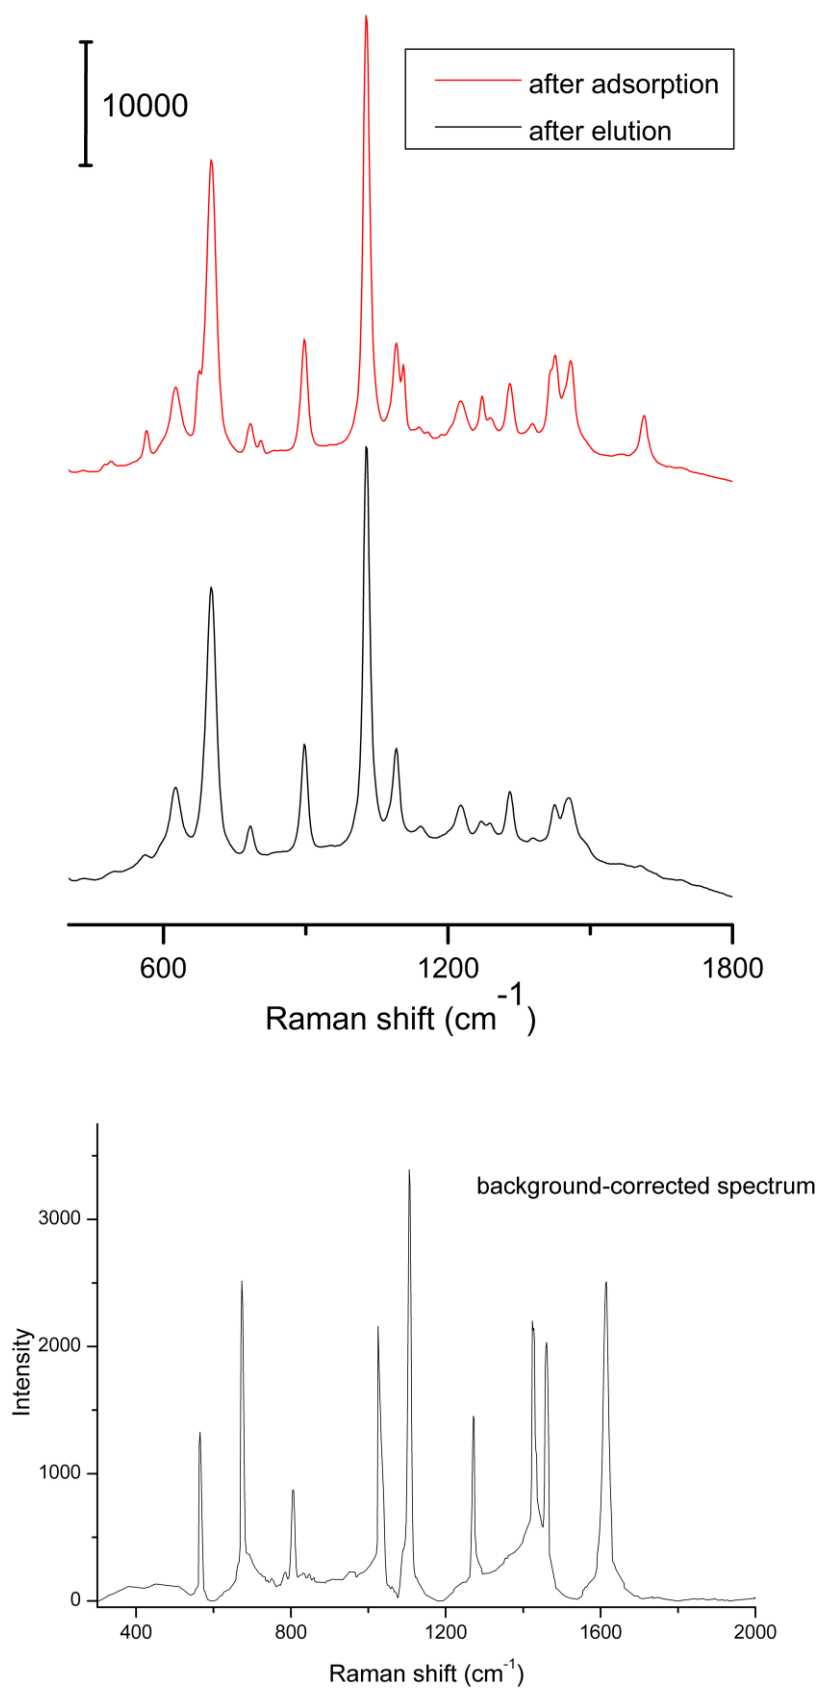

#### 4. The intensity changes of Fig 6 at $897\text{ cm}^{-1}$

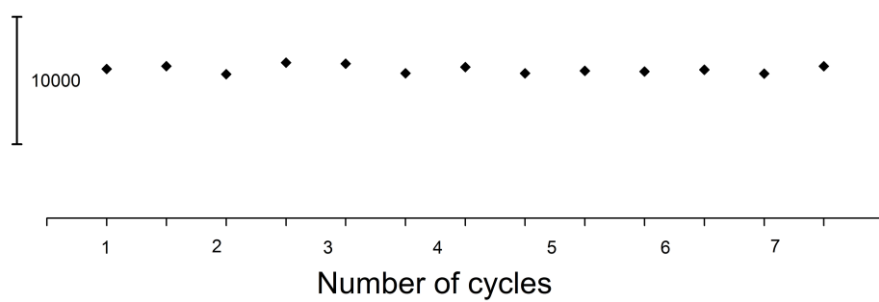

Supplement: c3an36700b.pdf [file c3an36700b.pdf]
